# Supplementary figures and images for: Staphylococcus aureus Induces Goat Endometrial Epithelial Cells Apoptosis via the Autophagy and Endoplasmic Reticulum Stress Pathway
Source: MDPI journal article supplement (doi:10.3390/ani12060711), 2022-03-11

Figure S1

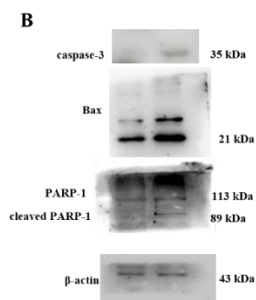

Figure S2

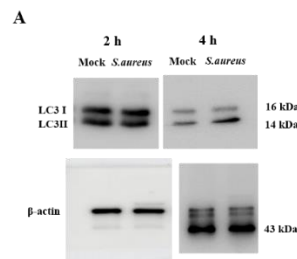

Figure S3

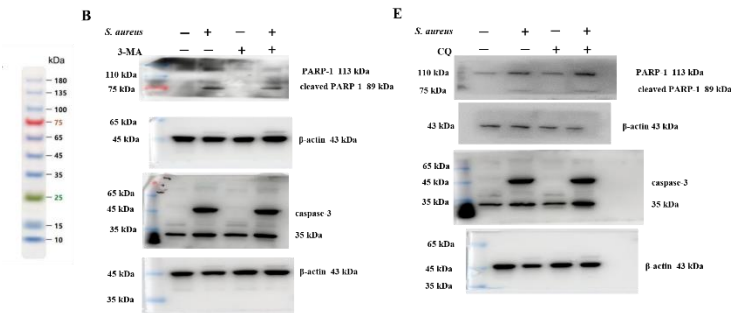

Figure S4

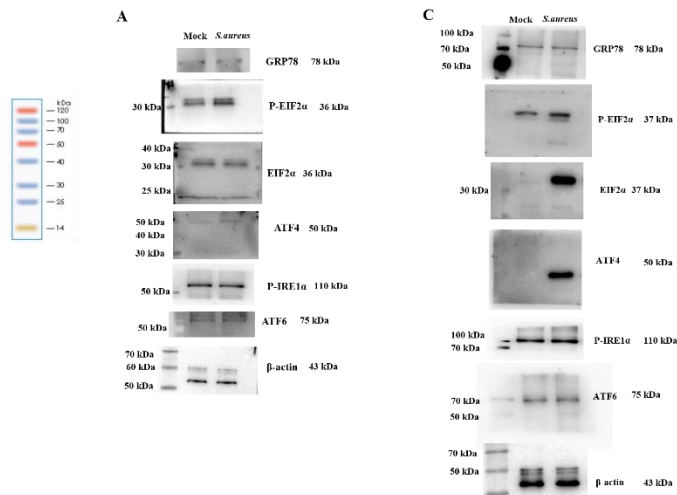

Figure S5

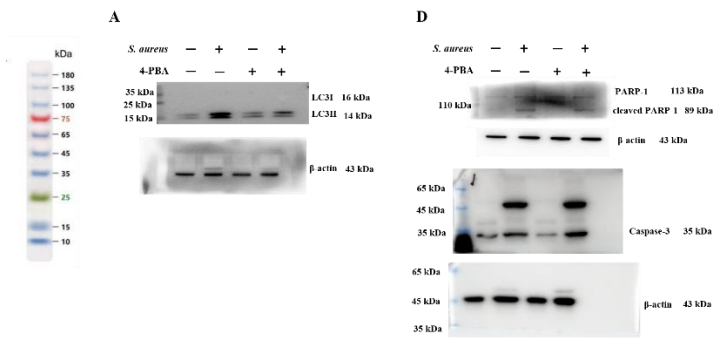

Supplement: s1 [file s1]
